# Supplementary material for: High summertime aerosol organic functional group concentrations from marine and seabird sources at Ross Island, Antarctica, during AWARE
Source: Copernicus journal article supplement (doi:10.5194/acp-18-8571-2018), 2018-06-18
Supplement: Supplementary file 1 [file acp-18-8571-2018-supplement.pdf]

Supplement of Atmos. Chem. Phys., 18, 8571–8587, 2018  
<https://doi.org/10.5194/acp-18-8571-2018-supplement>  
© Author(s) 2018. This work is distributed under  
the Creative Commons Attribution 4.0 License.

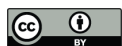

*Supplement of*

## **High summertime aerosol organic functional group concentrations from marine and seabird sources at Ross Island, Antarctica, during AWARE**

**Jun Liu et al.**

*Correspondence to:* Lynn M. Russell (lmrussell@ucsd.edu)

The copyright of individual parts of the supplement might differ from the CC BY 4.0 License.

## Figures

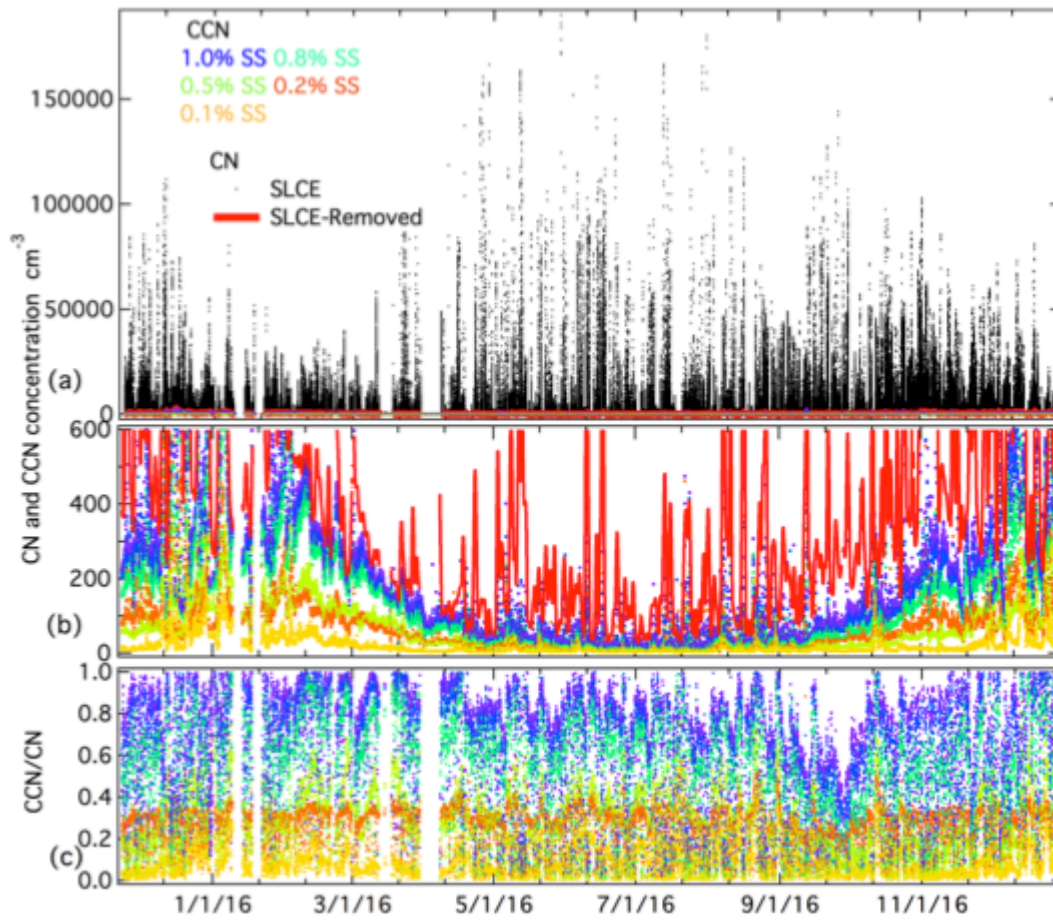

Figure S1. Concentrations of: (a) measured CN, (b) SLCE-removed CN and measured CCN, and (c) ratio of CCN to SLCE-removed CN.

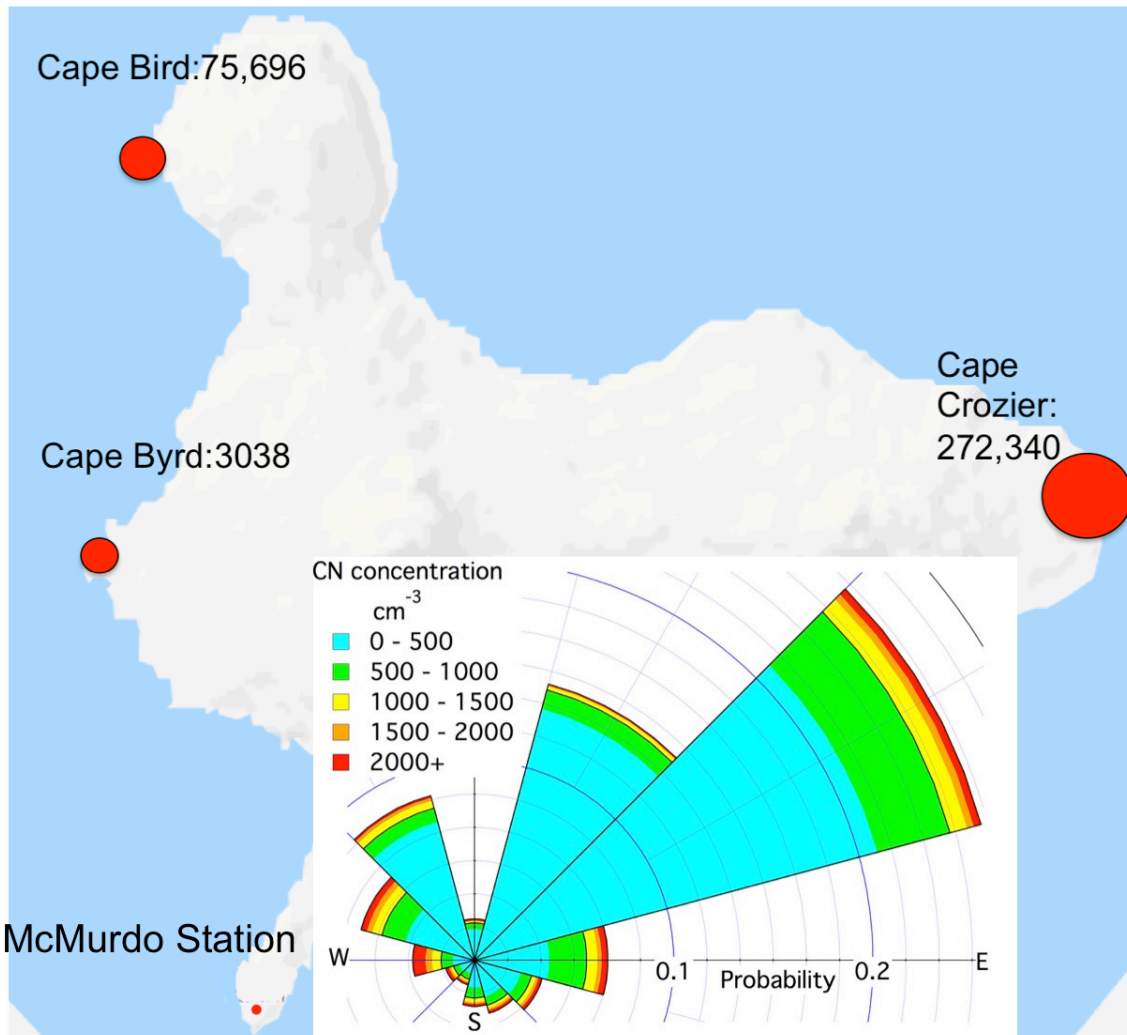

**Figure S2. Map of Ross Island with McMurdo Station and penguin colonies ( penguin numbers from Lyver et al., (2014) ) marked on the map. Windrose of CN concentration at the Cosray site is shown on the map.**

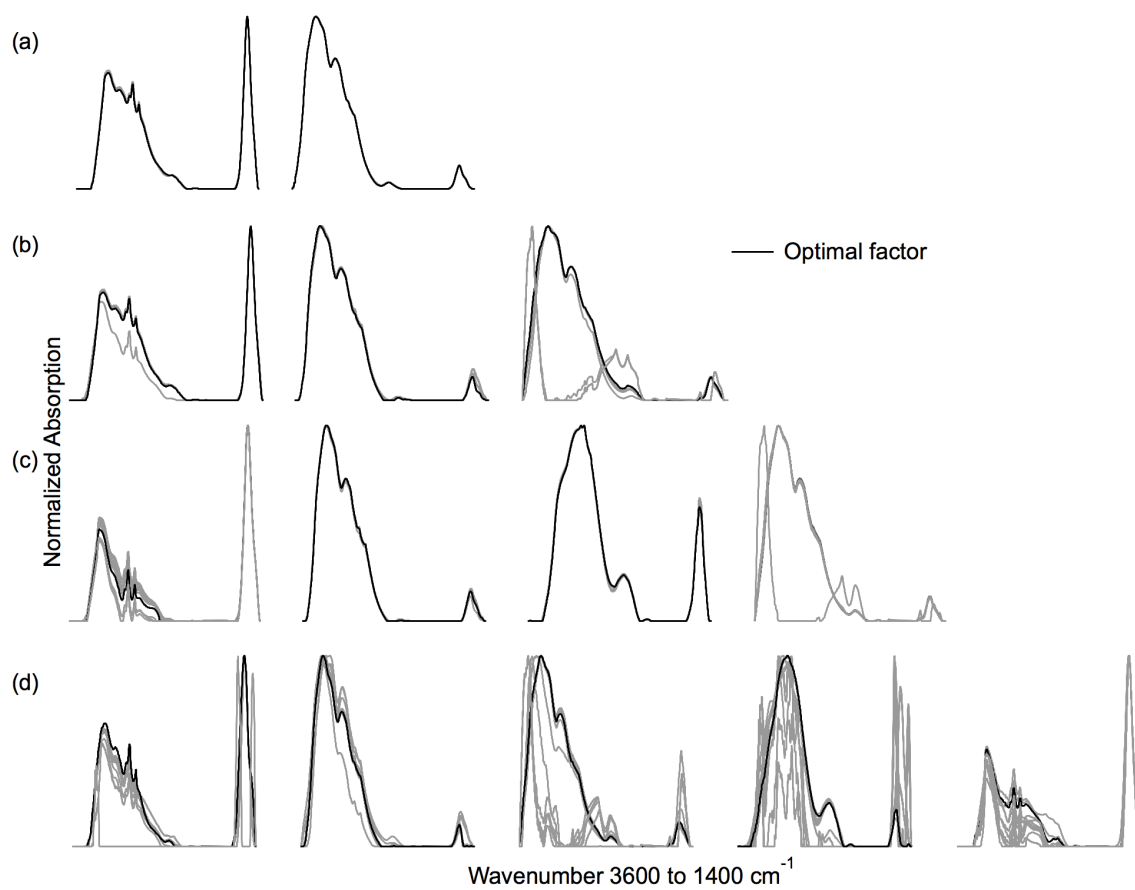

**Figure S3. FTIR PMF factors in 2 to 5 factor and -2 to 2 peak spaces**

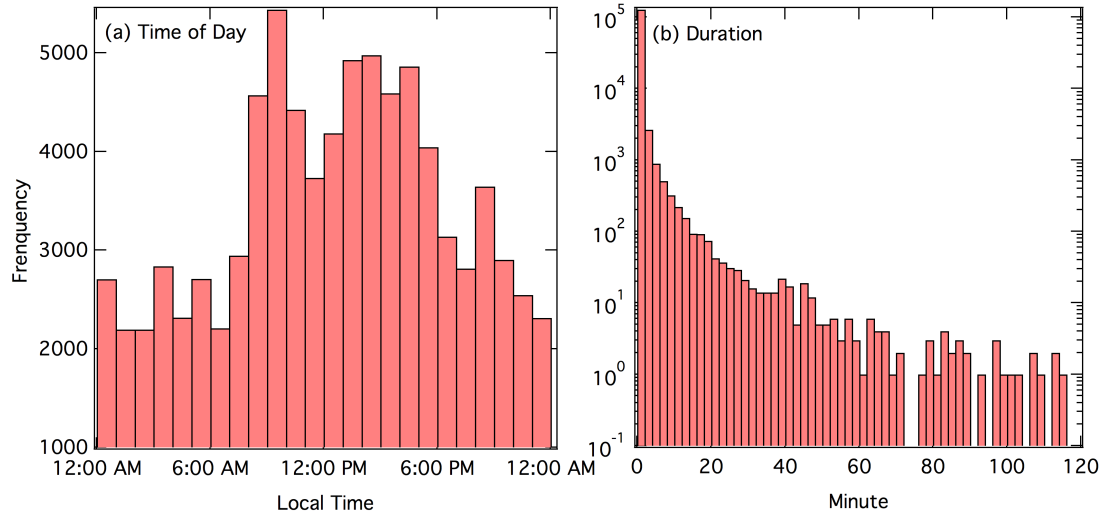

**Figure S4. Frequency distribution of SLCE with (a) Time of day, and (b) Duration.**

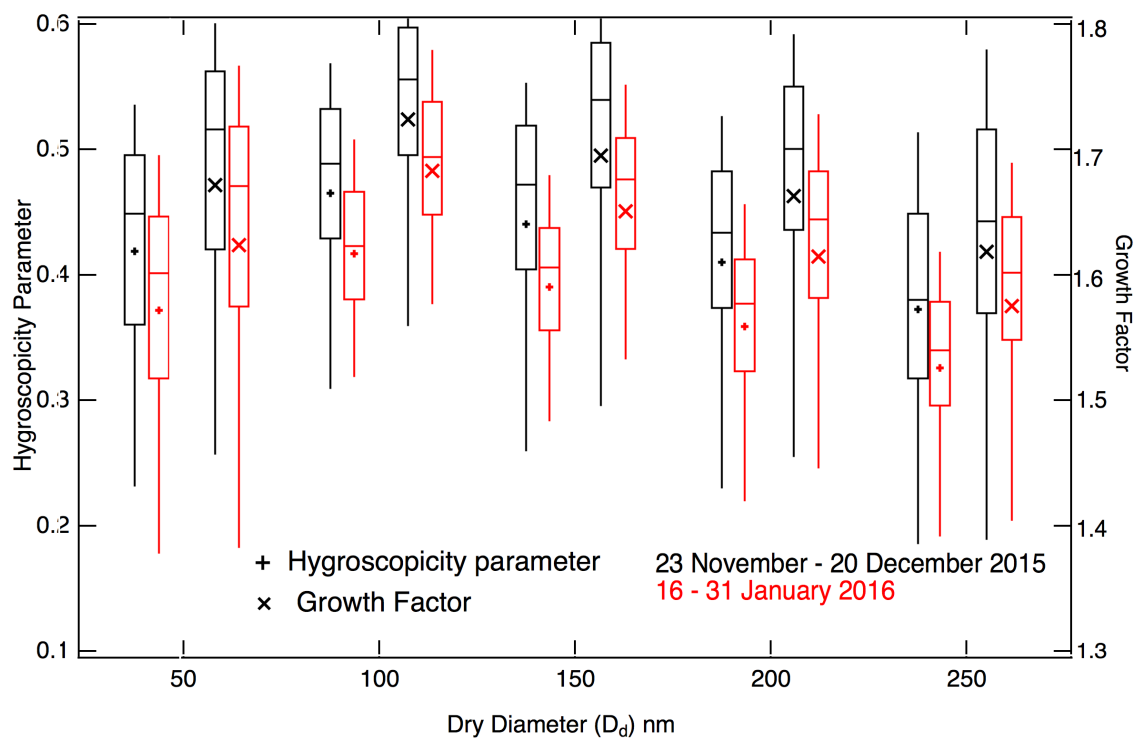

**Figure S5. Distribution of growth factor and hygroscopicity parameter  $\kappa$  in the two measurement periods from HTDMA. 5th, 25th, 50th, 75th and 90th percentiles are shown by the boxes and whiskers. Means are shown by the markers.**

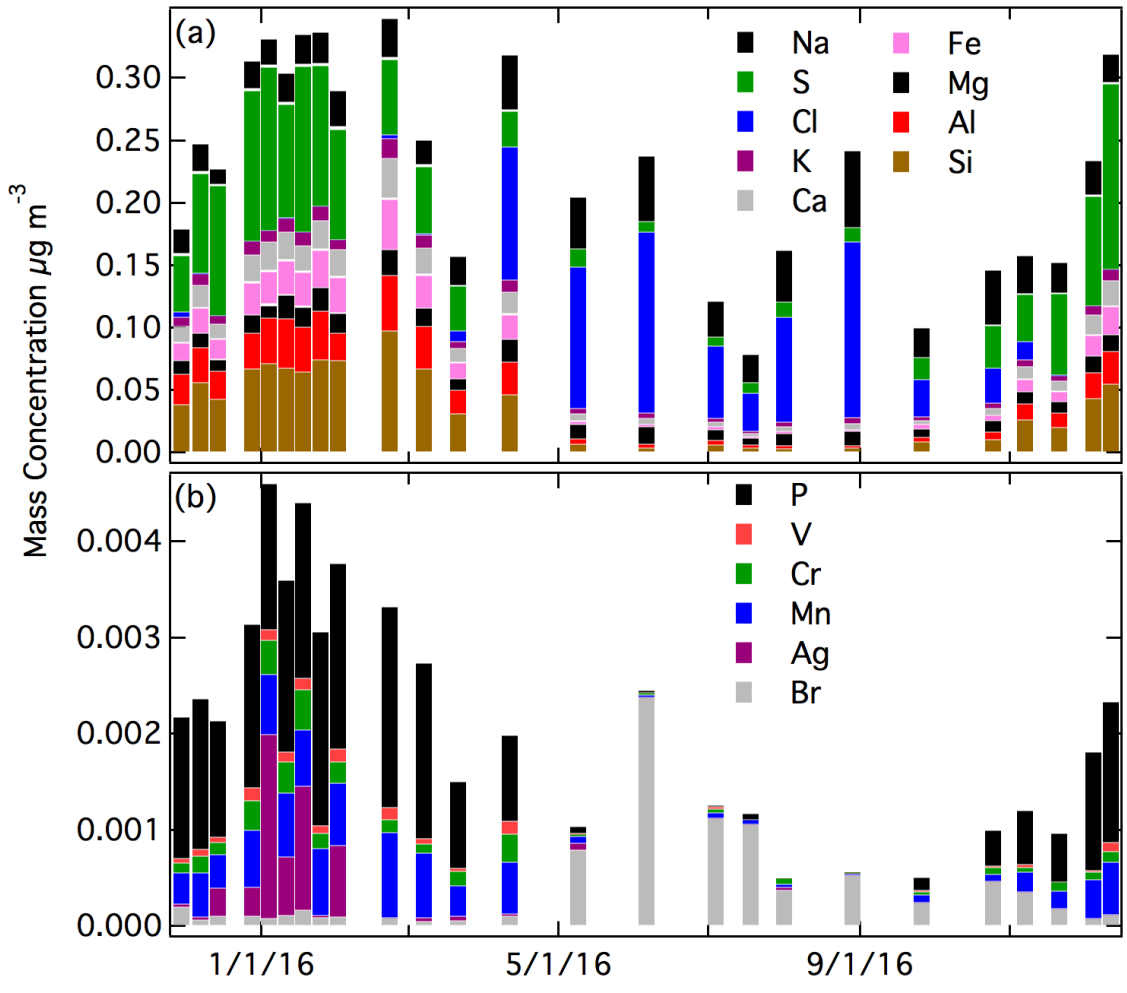

Figure S6. Elemental mass concentration from XRF.

## Tables

**Table S1. Marine amino acid measurements**

| Study                    | Year                              | Location                              | Season           | Type               | Particle Size     | Amino Acid Concentration             |                                |                             |
|--------------------------|-----------------------------------|---------------------------------------|------------------|--------------------|-------------------|--------------------------------------|--------------------------------|-----------------------------|
|                          |                                   |                                       |                  |                    |                   | Free dissolved<br>ng m <sup>-3</sup> | Combined<br>ng m <sup>-3</sup> | Total<br>ng m <sup>-3</sup> |
| Mace et al. 2003b        | 2000                              | Erdemli (Mediterranean coast), Turkey | Spring           | Marine             | TSP               | 33.8<br>(3.65–102)                   | –                              | –                           |
| Wedyan and Preston, 2008 | 2003                              | Atlantic Ocean (cruise)               | Spring           | Marine             | TSP               | 1.83<br>(0.27–9.13)                  | 9.13<br>(1.83–36.5)            | –                           |
| Kuznetsova et al. 2005   | 2003                              | Ligurian Sea (NW Mediterranean Sea)   | Spring           | Marine             | TSP               | –                                    | –                              | 225.88                      |
| Shi et al. 2010          | 2006                              | Qingdao (Coastal China)               | Spring           | Marine             | TSP               | 214                                  | –                              | –                           |
|                          | 2005                              | South China Sea (cruise)              | Spring           |                    |                   | 44.5                                 | –                              | –                           |
|                          | 2005–2006                         | Yellow Sea (cruise)                   | Spring           |                    |                   | 131                                  | –                              | –                           |
| Matsumoto et al. 2005    | 2000                              | Western Pacific Ocean (cruise)        | Spring<br>Summer | Marine             | TSP               | 0.98<br>(0.14–2.81)                  | –                              | –                           |
| Mace et al. 2003a        | 2000                              | Cape Grim, Tasmania, Australia        | Spring           | Marine             | TSP               | 8.74<br>(1.83–20.0)                  | –                              | –                           |
| Mandalakis et al. 2011   | 2007                              | Finokalia, Crete island, Greece       | Summer           | Marine             | TSP               | 23.6<br>(0.82–88.7)                  | 98.4<br>(34.8–215)             | –                           |
| Violaki et al. 2010      | 2007                              | Finokalia, Crete island, Greece       | Summer<br>Autumn | Marine             | PM <sub>1</sub>   | 45.6<br>–                            | –                              | –                           |
| Scalabrin et al. 2012    | 2010                              | Svalbard Islands, Norway              | Summer           | Polar (Arctic)     | PM <sub>10</sub>  | 0.23<br>(0.02–0.52)                  | –                              | –                           |
|                          |                                   |                                       |                  |                    | PM <sub>0.5</sub> | 0.15<br>(0.02–0.43)                  | –                              | –                           |
|                          |                                   |                                       |                  |                    | PM <sub>10</sub>  | 1.51                                 | –                              | –                           |
| Barbaro et al. 2015      | 2011                              | Faraglione Camp, Antarctica           | Summer           | Polar (Antarctica) | PM <sub>1</sub>   | 1.55                                 | –                              | –                           |
|                          | 2010–2011                         | Ross Sea (cruise)                     |                  |                    | TSP               | 0.48<br>(0.27–1.64)                  | –                              | –                           |
|                          | 2011                              | Dome C Station, Antarctic plateau     |                  |                    | PM <sub>10</sub>  | 0.11                                 | –                              | –                           |
|                          | 2012                              |                                       |                  |                    | 0.11              | –                                    | –                              |                             |
|                          | 2012                              |                                       |                  |                    | 0.11              | –                                    | –                              |                             |
| 2013                     | Dome C Station, Antarctic plateau | PM <sub>10</sub>                      | 0.1              | –                  | –                 |                                      |                                |                             |

Assuming an average amino acid molecular weight of 136.9 g.mol<sup>-1</sup>

Assuming an average amino acid nitrogen number of 1.



**Table S2. Parameters for FTIR PMF factor and K-means clustering evaluation.**

| Factors<br>Criteria                                                | Number of |        |            |            |            |
|--------------------------------------------------------------------|-----------|--------|------------|------------|------------|
|                                                                    | 2         | 3      | 4          | 5          | 6          |
| Q/Q <sub>exp</sub>                                                 | 7.06      | 6.02   | 4.75       | 3.90       | 3.25       |
| Absolute residual                                                  | 23.6%     | 21.7%  | 17.4%      | 14.2%      | 12.0%      |
| Temporal correlation factor<br>strength (r>0.8)                    | None      | None   | None       | None       | None       |
| Number of similar factor spectra<br>(Cosine similarity>0.8)        | None      | 1 pair | 1 pair     | 2<br>pairs | 4<br>pairs |
| Factors with less than 10% OM                                      | None      | None   | None       | 1          | 1          |
| Number of similar cluster<br>centroids (Cosine<br>similarity>0.95) | None      | 1 pair | 3<br>pairs | 4<br>pairs | 6<br>pairs |
